# Supplementary material for: Antibiotic Review Kit for Hospitals (ARK-Hospital): study protocol for a stepped-wedge cluster-randomised controlled trial
Source: Trials. 2019 Jul 11;20:421. doi: 10.1186/s13063-019-3497-y (PMC6625068; doi:10.1186/s13063-019-3497-y)
Supplement: Supplementary file 1 — SPIRIT 2013 checklist: recommended items to address in a clinical trial protocol and related documents. (DOC 160 kb) [file 13063_2019_3497_MOESM1_ESM.doc]

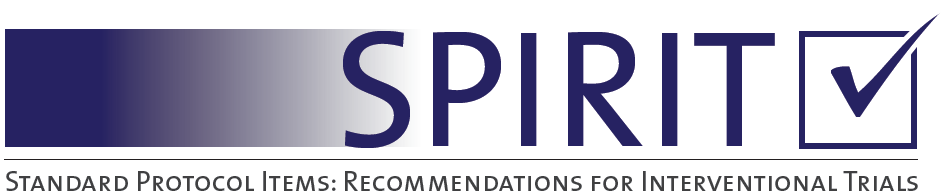


SPIRIT 2013 Checklist: Recommended items to address in a clinical trial protocol and related documents*

| Section/item | ItemNo | Description |
| --- | --- | --- |
| **Administrative information** | | |
| Title | 1 | Descriptive title identifying the study design, population, interventions, and, if applicable, trial acronym |
|  |  | This protocol is a three phase design, including a feasibility study, an internal pilot and a stepped-wedge cluster randomised trial. The title describes the main cluster-randomised trial trial |
| Trial registration | 2a | Trial identifier and registry name. If not yet registered, name of intended registry |
|  | Below abstract |
| 2b | All items from the World Health Organization Trial Registration Data Set |
|  |  | Below abstract, plus relevant headed sections in the main manuscript |
| Protocol version | 3 | Date and version identifier |
|  |  | Under “Main trial status” |
| Funding | 4 | Sources and types of financial, material, and other support |
|  |  | Under “Funding” |
| Roles and responsibilities | 5a | Names, affiliations, and roles of protocol contributors |
|  | Front page |
| 5b | Name and contact information for the trial sponsor |
|  |  | Through the corresponding author |
|  | 5c | Role of study sponsor and funders, if any, in study design; collection, management, analysis, and interpretation of data; writing of the report; and the decision to submit the report for publication, including whether they will have ultimate authority over any of these activities |
|  |  | Under “Funding” |
|  | 5d | Composition, roles, and responsibilities of the coordinating centre, steering committee, endpoint adjudication committee, data management team, and other individuals or groups overseeing the trial, if applicable (see Item 21a for data monitoring committee) |
|  |  | Under “Oversight” |
| Introduction |  |  |
| Background and rationale | 6a | Description of research question and justification for undertaking the trial, including summary of relevant studies (published and unpublished) examining benefits and harms for each intervention |
|  |  | Introduction |
|  | 6b | Explanation for choice of comparators |
|  |  | Comparator is care as usual |
| Objectives | 7 | Specific objectives or hypotheses |
|  |  | Under “Methods” “Objective” |
| Trial design | 8 | Description of trial design including type of trial (eg, parallel group, crossover, factorial, single group), allocation ratio, and framework (eg, superiority, equivalence, noninferiority, exploratory) |
|  |  | Under “Methods” “Design” |
| Methods: Participants, interventions, and outcomes | | |
| Study setting | 9 | Description of study settings (eg, community clinic, academic hospital) and list of countries where data will be collected. Reference to where list of study sites can be obtained |
|  |  | Under “Methods” “Objective” |
| Eligibility criteria | 10 | Inclusion and exclusion criteria for participants. If applicable, eligibility criteria for study centres and individuals who will perform the interventions (eg, surgeons, psychotherapists) |
|  |  | Under “Methods” “Inclusion/exclusion criteria” for Trusts who are randomised. Eligibility for electronic research data collection under “Outcomes and their assessment” |
| Interventions | 11a | Interventions for each group with sufficient detail to allow replication, including how and when they will be administered |
|  | Under “Methods” “Intervention” |
| 11b | Criteria for discontinuing or modifying allocated interventions for a given trial participant (eg, drug dose change in response to harms, participant request, or improving/worsening disease) |
|  | Not applicable: intervention is for healthcare professionals who will always use their professional judgement as to what is in the best interests of an individual patient |
| 11c | Strategies to improve adherence to intervention protocols, and any procedures for monitoring adherence (eg, drug tablet return, laboratory tests) |
|  | The complex intervention includes audit and feedback as an intrinsic component, but there are no specific strategies to increase adherence to protocol |
| 11d | Relevant concomitant care and interventions that are permitted or prohibited during the trial |
|  |  | The complex intervention does not specify any restrictions on care. |
| Outcomes | 12 | Primary, secondary, and other outcomes, including the specific measurement variable (eg, systolic blood pressure), analysis metric (eg, change from baseline, final value, time to event), method of aggregation (eg, median, proportion), and time point for each outcome. Explanation of the clinical relevance of chosen efficacy and harm outcomes is strongly recommended |
|  |  | Under “Methods” “Outcomes and their assessment” |
| Participant timeline | 13 | Time schedule of enrolment, interventions (including any run-ins and washouts), assessments, and visits for participants. A schematic diagram is highly recommended (see Figure) |
|  |  | Formally “participant” in this cluster randomised trial is the Trust – we have clearly described the time schedule of randomisation, implementation, sustainability in the main text, but there are no visits for participants. Data is collected on adult acute/general medical inpatients on a completely different timescale. We have added a SPIRIT Figure (Figure 3) describing this to be best of our ability. |
| Sample size | 14 | Estimated number of participants needed to achieve study objectives and how it was determined, including clinical and statistical assumptions supporting any sample size calculations |
|  |  | Under “Sample size” |
| Recruitment | 15 | Strategies for achieving adequate participant enrolment to reach target sample size |
|  |  | Under “Methods” “Inclusion/exclusion criteria” |
| **Methods: Assignment of interventions (for controlled trials)** | | |
| Allocation: |  |  |
| Sequence generation | 16a | Method of generating the allocation sequence (eg, computer-generated random numbers), and list of any factors for stratification. To reduce predictability of a random sequence, details of any planned restriction (eg, blocking) should be provided in a separate document that is unavailable to those who enrol participants or assign interventions |
|  |  | Under “Methods” “Randomisation” |
| Allocation concealment mechanism | 16b | Mechanism of implementing the allocation sequence (eg, central telephone; sequentially numbered, opaque, sealed envelopes), describing any steps to conceal the sequence until interventions are assigned |
|  |  | Under “Methods” “Randomisation” |
| Implementation | 16c | Who will generate the allocation sequence, who will enrol participants, and who will assign participants to interventions |
|  |  | Under “Methods” “Randomisation” |
| Blinding (masking) | 17a | Who will be blinded after assignment to interventions (eg, trial participants, care providers, outcome assessors, data analysts), and how |
|  |  | Under “Methods” “Intervention” |
|  | 17b | If blinded, circumstances under which unblinding is permissible, and procedure for revealing a participant’s allocated intervention during the trial |
|  |  | Not applicable |
| **Methods: Data collection, management, and analysis** | | |
| Data collection methods | 18a | Plans for assessment and collection of outcome, baseline, and other trial data, including any related processes to promote data quality (eg, duplicate measurements, training of assessors) and a description of study instruments (eg, questionnaires, laboratory tests) along with their reliability and validity, if known. Reference to where data collection forms can be found, if not in the protocol |
|  |  | Under “Methods” “Outcomes and their assessment” |
|  | 18b | Plans to promote participant retention and complete follow-up, including list of any outcome data to be collected for participants who discontinue or deviate from intervention protocols |
|  |  | Not applicable – all research data is routine electronic health records over which we have no control |
| Data management | 19 | Plans for data entry, coding, security, and storage, including any related processes to promote data quality (eg, double data entry; range checks for data values). Reference to where details of data management procedures can be found, if not in the protocol |
|  |  | Not applicable – all research data is routine electronic health records over which we have no control |
| Statistical methods | 20a | Statistical methods for analysing primary and secondary outcomes. Reference to where other details of the statistical analysis plan can be found, if not in the protocol |
|  |  | Under “Statistical analyses” |
|  | 20b | Methods for any additional analyses (eg, subgroup and adjusted analyses) |
|  |  | End of “Statistical analyses” |
|  | 20c | Definition of analysis population relating to protocol non-adherence (eg, as randomised analysis), and any statistical methods to handle missing data (eg, multiple imputation) |
|  |  | Under “Statistical analyses” and “Missing data” |
| **Methods: Monitoring** | | |
| Data monitoring | 21a | Composition of data monitoring committee (DMC); summary of its role and reporting structure; statement of whether it is independent from the sponsor and competing interests; and reference to where further details about its charter can be found, if not in the protocol. Alternatively, an explanation of why a DMC is not needed |
|  |  | Under “Oversight” |
|  | 21b | Description of any interim analyses and stopping guidelines, including who will have access to these interim results and make the final decision to terminate the trial |
|  |  | Under “Oversight” |
| Harms | 22 | Plans for collecting, assessing, reporting, and managing solicited and spontaneously reported adverse events and other unintended effects of trial interventions or trial conduct |
|  |  | Under “Outcomes and their assessment” |
| Auditing | 23 | Frequency and procedures for auditing trial conduct, if any, and whether the process will be independent from investigators and the sponsor |
|  |  | As all research data is from routine electronic health records no specific audits are planned. |
| Ethics and dissemination | | |
| Research ethics approval | 24 | Plans for seeking research ethics committee/institutional review board (REC/IRB) approval |
|  |  | Under “Main trial status” |
| Protocol amendments | 25 | Plans for communicating important protocol modifications (eg, changes to eligibility criteria, outcomes, analyses) to relevant parties (eg, investigators, REC/IRBs, trial participants, trial registries, journals, regulators) |
|  |  | Revised protocols are circulated to all investigators after approval by REC. |
| Consent or assent | 26a | Who will obtain informed consent or assent from potential trial participants or authorised surrogates, and how (see Item 32) |
|  |  | Not applicable – approval has been obtained to conduct the study without individual consent |
|  | 26b | Additional consent provisions for collection and use of participant data and biological specimens in ancillary studies, if applicable |
|  |  | Not applicable – approval has been obtained to conduct the study without individual consent |
| Confidentiality | 27 | How personal information about potential and enrolled participants will be collected, shared, and maintained in order to protect confidentiality before, during, and after the trial |
|  |  | No personal information is collected. The only confidential piece of information collected is date of death, with approval from the Confidentiality Advisory Group. |
| Declaration of interests | 28 | Financial and other competing interests for principal investigators for the overall trial and each study site |
|  |  | None – under “Conflicts of interest” |
| Access to data | 29 | Statement of who will have access to the final trial dataset, and disclosure of contractual agreements that limit such access for investigators |
|  |  | Under “Data sharing and dissemination” |
| Ancillary and post-trial care | 30 | Provisions, if any, for ancillary and post-trial care, and for compensation to those who suffer harm from trial participation |
|  |  | All care will be provided by NHS staff; usual mechanisms for compensation under the NHS apply. |
| Dissemination policy | 31a | Plans for investigators and sponsor to communicate trial results to participants, healthcare professionals, the public, and other relevant groups (eg, via publication, reporting in results databases, or other data sharing arrangements), including any publication restrictions |
|  |  | Under “Data sharing and dissemination” |
|  | 31b | Authorship eligibility guidelines and any intended use of professional writers |
|  |  | Under “Data sharing and dissemination” |
|  | 31c | Plans, if any, for granting public access to the full protocol, participant-level dataset, and statistical code |
|  |  | Under “Data sharing and dissemination” |
| Appendices |  |  |
| Informed consent materials | 32 | Model consent form and other related documentation given to participants and authorised surrogates |
|  |  | Not applicable |
| Biological specimens | 33 | Plans for collection, laboratory evaluation, and storage of biological specimens for genetic or molecular analysis in the current trial and for future use in ancillary studies, if applicable |
|  |  | Under “Outcomes and their assessment” |

*It is strongly recommended that this checklist be read in conjunction with the SPIRIT 2013 Explanation & Elaboration for important clarification on the items. Amendments to the protocol should be tracked and dated. The SPIRIT checklist is copyrighted by the SPIRIT Group under the Creative Commons “[Attribution-NonCommercial-NoDerivs 3.0 Unported](http://www.creativecommons.org/licenses/by-nc-nd/3.0/)” license.
